# Supplementary material for: Multiple viral infections in Agaricus bisporus - Characterisation of 18 unique RNA viruses and 8 ORFans identified by deep sequencing
Source: PubMed Central journal article supplement (PMC5446422; doi:10.1038/s41598-017-01592-9), 2017-05-26
Supplement: 41598_2017_1592_MOESM1_ESM.pdf [file 41598_2017_1592_MOESM1_ESM.pdf]

Supplementary Information:

**Title: Multiple viral infections in *Agaricus bisporus* - Characterisation of 18 unique RNA viruses and 8 ORFans identified by deep sequencing**

Authors: Gregory Deakin<sup>a,b,c,1</sup>, Edward Dobbs<sup>a,1</sup>, Ian M Jones<sup>b</sup>, Helen M Grogan<sup>c</sup>, and Kerry S Burton<sup>a, \*</sup>

## Supplementary Tables

**Table S1.** ORFans sequenced from samples of *A. bisporus*, their RNA length and Open Reading Frame (ORF) lengths.

| Name    | Contig | Length | ORF Length     |
|---------|--------|--------|----------------|
| ORFan 1 | C34    | 5078   | 513, 681, 1944 |
| ORFan 2 | C17    | 2311   | 426            |
| ORFan 3 | C19    | 1959   | 315            |
| ORFan 4 | C28    | 1935   | 315, 360       |
| ORFan 5 | C27    | 1110   | 528            |
| ORFan 6 | C38    | 1089   | 267, 276       |
| ORFan 7 | C24    | 927    | 258, 276, 324  |
| ORFan 8 | C31    | 703    | 291            |

The Name column corresponds to the proposed name for the discovered ORFan. The Contig column corresponds to contiguous RNA sequences assembled from the Illumina reads for each ORFan. The length and ORF length columns are in RNA bases and correspond respectively to the total length of the ORFan and length of ORFs above 250 bases.

**Table S2.** GenBank accession numbers for the virus and ORFan RNA molecules

| <b>Accession number</b> | <b>Virus name</b>                 |            |
|-------------------------|-----------------------------------|------------|
| KY357487                | Agaricus bisporus Virus 2         | AbV2       |
| KY357488                | Agaricus bisporus Virus 3         | AbV3       |
| KY357489                | Agaricus bisporus Virus 6 RNA1    | AbV6 RNA1  |
| KY357490                | Agaricus bisporus Virus 6 RNA2    | AbV6 RNA2  |
| KY357491                | Agaricus bisporus Virus 7         | AbV7       |
| KY357492                | Agaricus bisporus Virus 5         | AbV5       |
| KY357493                | Agaricus bisporus Virus 8         | AbV8       |
| KY357494                | Agaricus bisporus Virus 9         | AbV9       |
| KY357495                | Agaricus bisporus Virus 10        | AbV10      |
| KY357496                | Agaricus bisporus Virus 11        | AbV11      |
| KY357497                | Agaricus bisporus Virus 12        | AbV12      |
| KY357498                | Agaricus bisporus Virus 13        | AbV13      |
| KY357499                | Agaricus bisporus Virus 14        | AbV14      |
| KY357500                | Agaricus bisporus Mitovirus 1     | AbMV1      |
| KY357501                | Agaricus bisporus Virus 15        | AbV15      |
| KY357502                | Agaricus bisporus Virus 16 RNA1   | AbV16 RNA1 |
| KY357503                | Agaricus bisporus Virus 16 RNA2   | AbV16 RNA2 |
| KY357504                | Agaricus bisporus Virus 16 RNA3   | AbV16 RNA3 |
| KY357505                | Agaricus bisporus Virus 16 RNA4   | AbV16 RNA4 |
| KY357509                | Agaricus bisporus Endornavirus 1  | AbEV1      |
| KY357510                | Agaricus bisporus Spherical Virus | AbSV       |
| KY357511                | Mushroom Bacilliform Virus        | MBV        |
| KY357512                | ORFan2                            | ORFan2     |
| KY357513                | ORFan3                            | ORFan3     |
| KY357514                | ORFan4                            | ORFan4     |
| KY357515                | ORFan5                            | ORFan5     |
| KY357516                | ORFan7                            | ORFan7     |
| KY357517                | ORFan8                            | ORFan8     |
| KY357518                | ORFan6                            | ORFan6     |
| KY357519                | ORFan1                            | ORFan1     |

AbV2 described above (KY357487) is the canonical variant. Additionally the Accession numbers of the two other variants discussed are: KY357506 for the C19-C23-C1 variant of AbV2, and KY357507 for the C19-C1 variant of AbV2.

Additionally the variant of AbV6 (2990) has the Accession number KY357508.

**Table S3.** Abundance (depth of coverage) of the ‘modular’ contigs associated with the components of AbV2 (C1, C23 and C19) and their ratio in each sample/library.

| Library | Read coverage per 1kb (FPKM) |            |               | Ratios |        |         |
|---------|------------------------------|------------|---------------|--------|--------|---------|
|         | AbV2 (C1)                    | AbV2 (C23) | ORFan 3 (C19) | C1:C23 | C1:C19 | C23:C19 |
| 138     | 519.89                       | 739.77     | 301.29        | 0.70   | 1.73   | 2.46    |
| 003-A   | 5350.75                      | 5901.46    | 2431.71       | 0.91   | 2.2    | 2.43    |
| 003-B   | 5692.04                      | 6534.27    | 3775.24       | 0.87   | 1.51   | 1.73    |
| 004-A   | 390.37                       | 168.73     | 166.48        | 2.32   | 2.34   | 1.01    |
| 004-B   | 4174.26                      | 4986.66    | 2304.21       | 0.84   | 1.81   | 2.16    |
| 1497-A  | 5865.43                      | 6408.78    | 2993.09       | 0.92   | 1.96   | 2.14    |
| 1497-B  | 1448.05                      | 384.89     | 786.84        | 3.76   | 1.84   | 0.49    |
| 1283    | 83.65                        | 74.49      | 33.61         | 1.12   | 2.49   | 2.22    |
| 2735    | 482.95                       | 658.72     | 246.94        | 0.73   | 1.96   | 2.67    |
| 2786    | 131.83                       | 100.28     | 45.01         | 1.31   | 2.93   | 2.23    |
| 2919    | 51.82                        | 34.10      | 11.94         | 1.52   | 4.34   | 2.86    |
| 2990    | 71.14                        | 61.36      | 25.22         | 1.16   | 2.82   | 2.43    |
| 3209    | 264.62                       | 363.69     | 114.75        | 0.73   | 2.31   | 3.17    |

Reads from each sequenced library were aligned separately to the three contigs associated with AbV2 using bowtie2 and indexed using samtools. Fragments Per Kilobase of contig per Million mapped reads (FPKM) values were calculated in order to normalise the coverage of each contig. Ratios were calculated using the FPKM values

**Table S4.** Viruses and their accession numbers used to construct *Hypoviridae* phylogenetic tree (Figure S1).

| Accession | Short Name | Full name                                     |
|-----------|------------|-----------------------------------------------|
| M26965    | PPV        | <i>Plum pox virus</i>                         |
| D83408    | BaMMV      | <i>Bean mild mosaic virus</i>                 |
| AJ132268  | BaYMV      | <i>Barley yellow mosaic virus</i>             |
| AY533037  | FGDMV1     | <i>Fusarium graminearum dsRNA mycovirus-1</i> |
| AB698498  | RNV3       | <i>Rosellinia necatrix mycovirus 3</i>        |
| AF188514  | CHPV3      | <i>Cryphonectria hypovirus 3</i>              |
| JF781304  | SSHPV1     | <i>Sclerotinia sclerotiorum hypovirus 1</i>   |
| M57938    | CHPV1      | <i>Cryphonectria hypovirus 1</i>              |
| AY307099  | CHPV4      | <i>Cryphonectria hypovirus 4</i>              |
| L29010    | CHPV2      | <i>Cryphonectria hypovirus 2</i>              |
| KC330231  | FGHPV1     | <i>Fusarium graminearum hypovirus 1</i>       |

The Accession column corresponds to the GenBank accession for the virus. The Short Name column corresponds to the name used in Figure S1 and the Full name column gives the taxonomic name for the virus.

**Table S5.** Potential regulatory regions, GC content and variation across all samples for each virus and ORFan.

| Virus       | 5' UTR | 3' UTR | Poly-A | Shared Motif  | Pseudo-knots | GC%  | SNPS/kb |
|-------------|--------|--------|--------|---------------|--------------|------|---------|
| AbV2        | 35     | 779    |        |               | 5            | 50.2 | 0.22    |
| AbEV1       | 12     | 64     |        |               | 0            | 37.4 | 0.42    |
| AbV3        | 31     | 47     | y      |               | 0            | 39.8 | 1.27    |
| AbV5        | 21     | 37     |        |               | 0            | 40.2 | 0.07    |
| AbV6 RNA 1  | 30     | 550    | y      | A> 226b in 3' | 3            | 44.9 | 6.18    |
| AbV6 RNA 2  | 2090   | 378    | y      | A> 226b in 3' | 6            | 42.2 | 4.20    |
| AbV7        | 12     | 536    | y      |               | 5            | 51.9 | 1.80    |
| AbSV        | 5      | 345    |        |               | 3            | 45.5 | 5.14    |
| AbV8        | 96     | 155    |        |               | 3            | 48.7 | 1.30    |
| AbV9        | 32     | 0      |        |               | 0            | 58.3 | 0.17    |
| AbV10       | 98     | 109    |        |               | 0            | 46.3 | 0.93    |
| AbV11       | 44     | 164    |        |               | 1            | 45.4 | 2.61    |
| AbV12       | 0      | 110    |        |               | 1            | 54.3 | 7.73    |
| AbV13       | 50     | 255    |        |               | 2            | 55.0 | 1.09    |
| MBV         | 9      | 250    |        |               | 2            | 46.3 | 3.97    |
| AbMV1       | 385    | 183    |        |               | 1            | 35.9 | 0.18    |
| AbV14       | 641    | 51     | y      |               | 1            | 43.1 | 9.44    |
| AbV15       | 507    | 105    | y      |               | 0            | 48.2 | 0.10    |
| AbV16 RNA 1 | 75     | 63     | y      | B> 25b in 3'  | 1            | 48.3 | 8.84    |
| AbV16 RNA 2 | 61     | 53     | y      | B> 25b in 3'  | 0            | 50.2 | 10.13   |
| AbV16 RNA 3 | 38     | 99     | y      | B> 25b in 3'  | 3            | 50.3 | 2.88    |
| AbV16 RNA 4 | 47     | 95     | y      | B> 25b in 3'  | 0            | 46.2 | 1.79    |
| ORFan 1     | 0      | 0      |        |               |              | 50.5 | 1.48    |
| ORFan 2     | 1614   | 272    |        |               |              | 48.8 | 0.04    |
| ORFan 3     | 668    | 975    |        |               |              | 48.7 | 0.05    |
| ORFan 4     | †      | †      |        |               |              | 54.3 | 0.21    |
| ORFan 5     | †      | †      |        |               |              | 55.4 | 0.27    |
| ORFan 6     | 0      | 0      |        |               |              | 44.5 | 0.92    |
| ORFan 7     | †      | †      | y      |               |              | 58.7 | 0.32    |
| ORFan 8     | 59     | 354    | y      |               |              | 52.2 | 1.90    |

The 5' UTR and 3' UTR columns correspond to the length in bases for both of these regions. The poly-A column denotes whether a poly-A tail was associated with the sequenced virus. The shared motif column indicates a shared motif between molecules as indicated. The Pseudo-knots column corresponds to number of pseudoknots predicted in both 5'UTR and 3' UTR using DotKnot\_1.3.1 (49). The SNPS/Kb column corresponds to the mean between samples of SNPS/Kb for each virus compared to the reference sequence.

† Possibly circular

**Table S6.** Viruses and their accession numbers used to construct *Narnaviridae* phylogenetic tree (Figure S2).

| Accession | Short Name | Full name                                      |
|-----------|------------|------------------------------------------------|
| EU770620  | EpCV       | <i>Epirus cherry virus</i>                     |
| FJ157981  | CsVC       | <i>Cassava virus C</i>                         |
| EU770623  | OuMV       | <i>Ourmia melon virus</i>                      |
| JN400241  | PiRV-4     | <i>Phytophthora infestans RNA virus 4</i>      |
| AF039063  | ScNV-20S   | <i>Saccharomyces cerevisiae narnavirus 20S</i> |
| U90136    | ScNV-23S   | <i>Saccharomyces 23S RNA narnavirus</i>        |
| AJ004930  | OMV3a      | <i>Ophiostoma mitovirus 3a</i>                 |
| AM087548  | OMV1a      | <i>Ophiostoma mitovirus 1a</i>                 |
| AJ132755  | OMV5       | <i>Ophiostoma mitovirus 5</i>                  |
| AJ132756  | OMV6       | <i>Ophiostoma mitovirus 6</i>                  |

The Accession column corresponds to the GenBank accession for the virus. The Short Name column corresponds to the name used in Figure S2 and the Full name column gives the taxonomic name for the virus.

**Table S7.** The sequences of transcripts of Brown Cap Mushroom Virus identified by Eastwood *et al.* (2015) are homologous to the AbV16 viral components and ORFan8.

| Query id | Subject id  | % identity | alignment length | mismatches | e-value              |
|----------|-------------|------------|------------------|------------|----------------------|
| LN867098 | AbV16 RNA 1 | 100        | 108              | 0          | $4 \times 10^{-58}$  |
| LN867097 | AbV16 RNA 1 | 97.63      | 169              | 4          | $1 \times 10^{-86}$  |
| LN867094 | AbV16 RNA 1 | 99.47      | 189              | 1          | $8 \times 10^{-104}$ |
| LN867096 | AbV16 RNA 2 | 100        | 99               | 0          | $9 \times 10^{-53}$  |
| LN867091 | AbV16 RNA 2 | 99.07      | 214              | 2          | $3 \times 10^{-116}$ |
| LN867089 | AbV16 RNA 2 | 100        | 237              | 0          | $9 \times 10^{-135}$ |
| LN867088 | AbV16 RNA 2 | 98.57      | 210              | 3          | $4 \times 10^{-112}$ |
| LN867093 | AbV16 RNA 3 | 100        | 98               | 0          | $3 \times 10^{-52}$  |
| LN867092 | AbV16 RNA 3 | 100        | 200              | 0          | $1 \times 10^{-112}$ |
| LN867087 | AbV16 RNA 3 | 99.03      | 414              | 4          | 0                    |
| LN867086 | AbV16 RNA 4 | 99.79      | 475              | 1          | 0                    |
| LN867095 | ORFan 8     | 100        | 100              | 0          | $3 \times 10^{-53}$  |
| LN867090 | ORFan 8     | 100        | 242              | 0          | $1 \times 10^{-137}$ |

The Query id column corresponds to the non-host transcript GenBank accession and the Subject id column corresponds to the viral segment. The % identity column indicates similarity between the aligned sequences. Alignment length corresponds to the length in nucleotides over which an alignment was found between the two sequences. The mismatches column indicates the number of mismatched nucleotides in the alignment. The e-value column indicates the likelihood of the alignment occurring due to random chance.



**Table S8.** Sequences and their accession numbers present in NCBI Transcriptome Shotgun Assembly database with homology to viruses of *Narnaviridae* family.

| Accession                 | Host                                        | Homology | e-value             |
|---------------------------|---------------------------------------------|----------|---------------------|
| HP641214                  | <i>Alasmidonta varicosa</i>                 | EpCV     | $2 \times 10^{-52}$ |
| GACH01090825              | <i>Chromolaena odorata</i>                  | OuMV     | $3 \times 10^{-13}$ |
| <sup>2</sup> GACI01002802 | <i>Uromyces appendiculatus</i>              | ScNV-23s | $5 \times 10^{-18}$ |
| GACM01002912              | <i>Phakopsora pachyrhizi</i>                | PiRV-4   | 0                   |
| GADD01004427              | <i>Pyropia haitanensis</i>                  | PIRV-4   | $9 \times 10^{-43}$ |
| GAEK01031901              | <i>Pseudotsuga menziesii var. menziesii</i> | CsVC     | $2 \times 10^{-9}$  |
| GAIR01011807              | <i>Puccinia striiformis</i>                 | ScNV-20s | $2 \times 10^{-22}$ |
| <sup>2</sup> GAIR01012025 | <i>Puccinia striiformi</i>                  | ScNV-23s | $3 \times 10^{-18}$ |
| <sup>2</sup> GAIR01012062 | <i>Puccinia striiformis</i>                 | ScNV-23s | $9 \times 10^{-15}$ |
| <sup>2</sup> GAIS01005902 | <i>Puccinia striiformis</i>                 | ScNV-23s | $7 \times 10^{-15}$ |
| <sup>1</sup> KF298275     | Uncultured virus isolate                    | ScNV-23s | $3 \times 10^{-17}$ |
| <sup>1</sup> KF298284     | Uncultured virus isolate                    | ScNV-20s | $4 \times 10^{-21}$ |

The Accession column corresponds to the GenBank accession for the homologous sequence. The Host column corresponds to the organism (if known) from which RNA was extracted. The Homology column corresponds to the virus where the homology was found and the e-value column indicates the likelihood of the alignment occurring due to random chance.

<sup>1</sup> Known but unnamed viruses isolated by Cook *et al.* (33)

<sup>2</sup> Previously reported by Cook *et al.* (33)

**Table S9.** Sequences and their accession numbers present in the NCBI Transcriptome Shotgun Assembly database with homology to viruses of *Tymovirales* order.

| Accession    | Host                   | Homology            | e-value             |
|--------------|------------------------|---------------------|---------------------|
| GAHU01094215 | <i>Agave Tequilana</i> | BOTVF               | $1 \times 10^{-22}$ |
| GAHU01087027 | <i>Agave Tequilana</i> | BOTVF               | $5 \times 10^{-23}$ |
| GAHU01124587 | <i>Agave Tequilana</i> | Pepino mosaic virus | $4 \times 10^{-29}$ |
| GAHU01077006 | <i>Agave Tequilana</i> | BOTVF               | $2 \times 10^{-64}$ |

The Accession column corresponds to the GenBank accession for the homologous sequence. The Host column corresponds to the organism (if known) from which RNA was extracted. The Homology column corresponds to the virus where the homology was found and the e-value column indicates the likelihood of the alignment occurring due to random chance.

**Table S10.** Viruses and their accession numbers used to construct *Tymovirales* phylogenetic tree (Figure S3).

| Accession | Short Name | Full name                                                     |
|-----------|------------|---------------------------------------------------------------|
| M58152    | ACLSP      | <i>Apple chlorotic leaf spot virus</i>                        |
| D14995    | ASGVP      | <i>Apple stem grooving virus</i>                              |
| D21829    | ASPVP      | <i>Apple stem pitting virus</i>                               |
| AF238884  | BOTVF      | <i>Botrytis virus F</i>                                       |
| AY055762  | BOTVX      | <i>Botrytis virus X</i>                                       |
| AJ318061  | CLBVS      | <i>Citrus leaf blotch virus</i>                               |
| AJ309022  | GFKVM      | <i>Grapevine fleck virus</i>                                  |
| X75433    | GVAIS      | <i>Grapevine virus A</i>                                      |
| AF406744  | ICRSV      | <i>Indian citrus ringspot virus</i>                           |
| EU489641  | LOLV       | <i>Lolium latent virus</i>                                    |
| AF265566  | MRFVC      | <i>Maize rayado fino virus</i>                                |
| D14449    | PVMR       | <i>Potato virus M</i>                                         |
| EU835937  | PVT92      | <i>Potato virus T</i>                                         |
| D00344    | PVXX3      | <i>Potato virus X</i>                                         |
| M97264    | SHVX       | <i>Shallot virus X</i>                                        |
| AY147260  | SSDRV      | <i>Sclerotinia sclerotiorum debilitation-associated virus</i> |
| X07441    | TYMV       | <i>Turnip yellow mosaic virus</i>                             |
| AY182001  | OMSV       | <i>Oyster mushroom spherical virus</i>                        |
| AF126284  | AURAV      | <i>Aura virus</i>                                             |
| AY112987  | SFV        | <i>Semliki forest virus</i>                                   |
| J02363    | SINV       | <i>Sindbis virus</i>                                          |

The Accession column corresponds to the GenBank accession for the virus. The Short Name column corresponds to the name used in Figure S3 and the Full name column gives the taxonomic name for the virus.

**Table S11.** Viruses and their accession numbers used to construct the Rubi-like tree (Figure S4).

| Accession | Short name | Full name                                   |
|-----------|------------|---------------------------------------------|
| EU779934  | SsRV-L     | <i>Sclerotinia sclerotiorum</i> RNA virus L |
| AY258322  | RUBV       | <i>Rubella virus</i>                        |
| AY535004  | AHEV       | <i>Avian hepatitis E virus</i>              |
| M73218    | HEV-1      | <i>Hepatitis E virus (Human)</i>            |
| AF082843  | HEV-3      | <i>Hepatitis E virus (Swine)</i>            |
| AF102884  | NbetaV     | <i>Nudaurelia capensis beta virus</i>       |
| U18246    | HaSV       | <i>Helicoverpa armigera stunt virus</i>     |
| AY594352  | DpTV       | <i>Dendrolimus punctatus tetravirus</i>     |
| AF280539  | BSBMV      | <i>Beet soil-borne mosaic virus</i>         |
| D84410    | BNYVV      | <i>Beet necrotic yellow vein virus</i>      |
| AF126284  | AURAV      | <i>Aura virus</i>                           |
| AY112987  | SFV        | <i>Semliki forest virus</i>                 |
| J02363    | SINV       | <i>Sindbis virus</i>                        |

The Accession column corresponds to the GenBank accession for the virus. The Short Name column corresponds to the name used in Figure S4 and the Full name column gives the taxonomic name for the virus.

**Table S12.** Viruses and their accession numbers used to construct alphavirus-like supergroup phylogenetic tree (Figure S5).

| Accession | Virus                                         | Grouping     |
|-----------|-----------------------------------------------|--------------|
| AF126284  | <i>Aura virus</i>                             | Alphavirus   |
| AY112987  | <i>Semliki forest virus</i>                   | Alphavirus   |
| J02363    | <i>Sindbis virus</i>                          | Alphavirus   |
|           | <i>Agaricus bisporus endornavirus 1</i>       | Endornavirus |
| JQ951943  | <i>Bell pepper endornavirus</i>               | Endornavirus |
| JX678977  | <i>Grapevine endophyte endornavirus</i>       | Endornavirus |
| DQ399289  | <i>Gremmeniella abietina type B RNA virus</i> | Endornavirus |
| D32136    | <i>Oryza sativa endornavirus</i>              | Endornavirus |
| AJ877914  | <i>Phytophthora endornavirus 1</i>            | Endornavirus |
| HQ380014  | <i>Tuber aestivum endornavirus</i>            | Endornavirus |
| AJ000929  | <i>Vicia faba endornavirus</i>                | Endornavirus |
| AY535004  | <i>Avian hepatitis E virus</i>                | Rubi-like    |
| D84410    | <i>Beet necrotic yellow vein virus</i>        | Rubi-like    |
| AF280539  | <i>Beet soil-borne mosaic virus</i>           | Rubi-like    |
| AY594352  | <i>Dendrolimus punctatus tetravirus</i>       | Rubi-like    |
| U18246    | <i>Helicoverpa armigera stunt virus</i>       | Rubi-like    |
| M73218    | <i>Hepatitis E virus (Human)</i>              | Rubi-like    |
| AF082843  | <i>Hepatitis E virus (Swine)</i>              | Rubi-like    |
| AF102884  | <i>Nudaurelia capensis beta virus</i>         | Rubi-like    |
| AY258322  | <i>Rubella virus</i>                          | Rubi-like    |
| EU779934  | <i>Sclerotinia sclerotiorum RNA virus L</i>   | Rubi-like    |
| X52774    | <i>Barley stripe mosaic virus</i>             | Tobamo-like  |
| X73476    | <i>Beet yellow virus</i>                      | Tobamo-like  |
| X01678    | <i>Brome mosaic virus</i>                     | Tobamo-like  |
| D00355    | <i>Cucumber mosaic virus</i>                  | Tobamo-like  |
| U15440    | <i>Lettuce infectious yellow virus</i>        | Tobamo-like  |
| X94347    | <i>Olive latent virus 2</i>                   | Tobamo-like  |
| X78602    | <i>Peanut clump virus</i>                     | Tobamo-like  |
| AJ272328  | <i>Pelargonium zonate spot virus</i>          | Tobamo-like  |
| AB000709  | <i>Pepper mild mottle virus</i>               | Tobamo-like  |
| AJ238607  | <i>Potato mop-top virus</i>                   | Tobamo-like  |
| L07937    | <i>Soil-borne wheat mosaic virus</i>          | Tobamo-like  |
| V01408    | <i>Tobacco mosaic virus</i>                   | Tobamo-like  |
| AF166084  | <i>Tobacco rattle virus</i>                   | Tobamo-like  |
| U75538    | <i>Tobacco streak virus</i>                   | Tobamo-like  |
| AJ132845  | <i>Tomato mosaic virus</i>                    | Tobamo-like  |
| KY357510  | <i>Agaricus bisporus spherical virus</i>      | Tymovirales  |
| KY357497  | <i>Agaricus bisporus virus 12</i>             | Tymovirales  |
| KY357498  | <i>Agaricus bisporus virus 13</i>             | Tymovirales  |
| KY357502  | <i>Agaricus bisporus virus 16</i>             | Tymovirales  |
| KY357488  | <i>Agaricus bisporus virus 3</i>              | Tymovirales  |
| KY357492  | <i>Agaricus bisporus virus 5</i>              | Tymovirales  |
| KY357489  | <i>Agaricus bisporus virus 6</i>              | Tymovirales  |

| Accession | Virus                                                         | Grouping    |
|-----------|---------------------------------------------------------------|-------------|
| KY357491  | <i>Agaricus bisporus virus 7</i>                              | Tymovirales |
| KY357494  | <i>Agaricus bisporus virus 9</i>                              | Tymovirales |
| M58152    | <i>Apple chlorotic leaf spot virus</i>                        | Tymovirales |
| D14995    | <i>Apple stem grooving virus</i>                              | Tymovirales |
| D21829    | <i>Apple stem pitting virus</i>                               | Tymovirales |
| AF238884  | <i>Botrytis virus F</i>                                       | Tymovirales |
| AY055762  | <i>Botrytis virus X</i>                                       | Tymovirales |
| AJ318061  | <i>Citrus leaf blotch virus</i>                               | Tymovirales |
| AJ309022  | <i>Grapevine fleck virus</i>                                  | Tymovirales |
| X75433    | <i>Grapevine virus A</i>                                      | Tymovirales |
| AF406744  | <i>Indian citrus ringspot virus</i>                           | Tymovirales |
| EU489641  | <i>Lolium latent virus</i>                                    | Tymovirales |
| AF265566  | <i>Maize rayado fino virus</i>                                | Tymovirales |
| AY182001  | <i>Oyster mushroom spherical virus</i>                        | Tymovirales |
| D14449    | <i>Potato virus M</i>                                         | Tymovirales |
| EU835937  | <i>Potato virus T</i>                                         | Tymovirales |
| D00344    | <i>Potato virus X</i>                                         | Tymovirales |
| AY147260  | <i>Sclerotinia sclerotiorum debilitation-associated virus</i> | Tymovirales |
| M97264    | <i>Shallot virus X</i>                                        | Tymovirales |
| X07441    | <i>Turnip yellow mosaic virus</i>                             | Tymovirales |

The Accession column corresponds to the GenBank accession for the virus. The grouping column corresponds to the phylogenetic node where the virus is located in Figure S5.

## Supplementary Figures

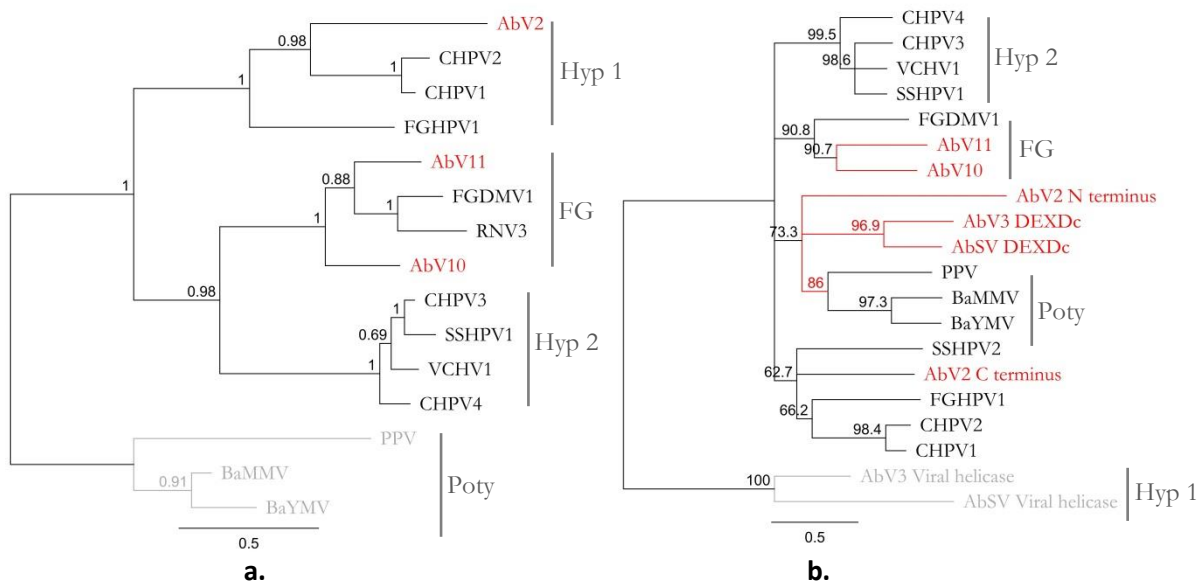

**Figure S1.** Comparison of proposed phylogenetic trees built using the RdRp domains and the helicase domains of the *Hypoviridae* family.

**a.** Bayesian inference tree of RdRp domains from selected viruses from the Hypoviridae family. The RdRp domains were aligned using MUSCLE and stripped of all gap positions. The phylogenetic tree was calculated using Mr Bayes with default parameters and a burn-in of 1,000,000 cycles. Values indicate the posterior probability of the clade. Selected members of the Potyviridae were used as an out-group.

**b.** Neighbour-joining tree of helicase domains from selected members of the Hypoviridae and Potyviridae families. The RNA helicase domains (SUPERFAMILY SSF52540) were aligned using MUSCLE. The Neighbour-joining tree was constructed using full alignment (no gap positions deleted). Values indicate the consensus support for the clade based on 1000 bootstrap replicates. Branches corresponding to clades with less than 60% bootstrap support were collapsed.

Red nodes indicate viruses described in this study. Grey nodes indicate out-group. Scale bars represent amino-acid substitutions per site.

Full name and accession for viruses given in Supplementary Table S4.

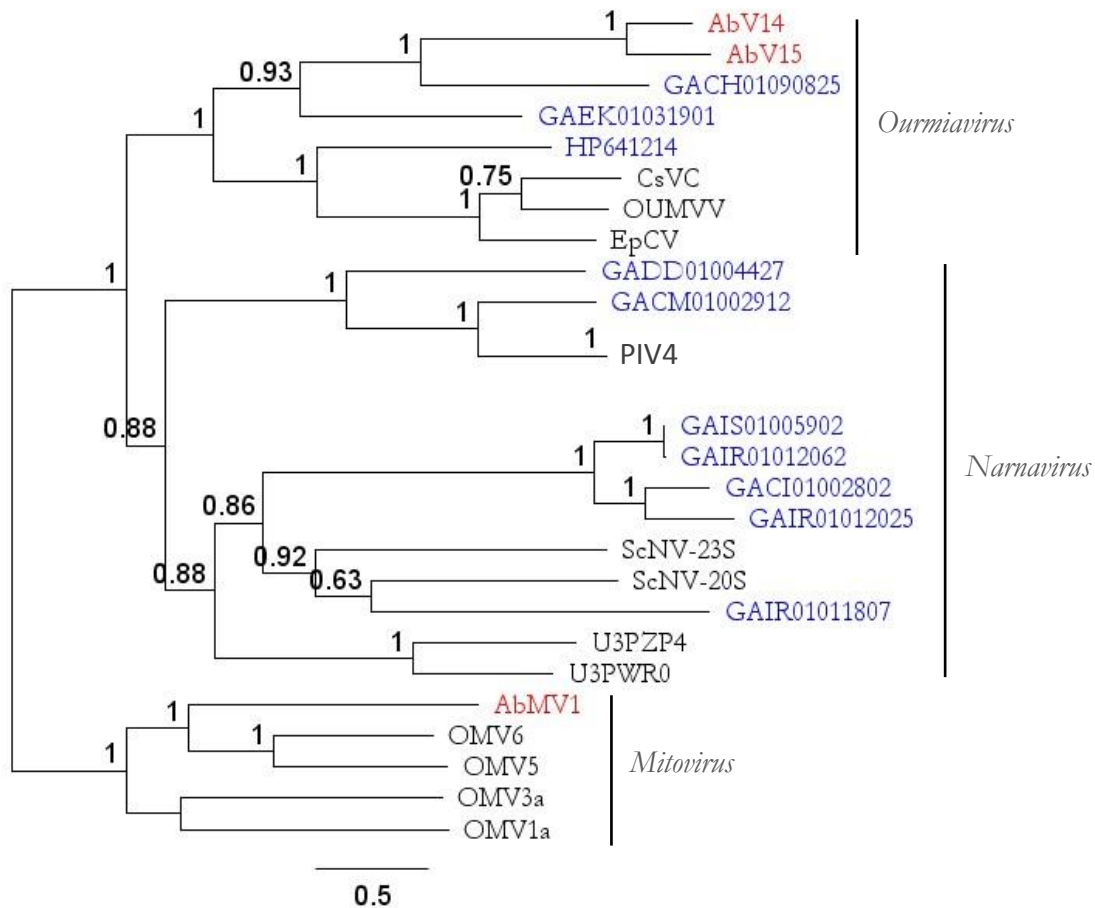

**Figure S2.** Proposed phylogenetic tree describing the relatedness of selected members of the *Narnaviridae* family and the *Ourmiavirus* genus. Full length replicase amino-acid sequences were aligned using MUSCLE. The Bayesian Inference Tree was calculated using Mr Bayes with default parameters and a burn-in of 1,000,000 cycles. Values indicate the posterior probability of the clade. Red nodes indicate viruses described in this study. Blue nodes indicate viral-like sequences found in Transcriptome Shotgun Assembly database (e-values are given in Supp. Table S8). The scale bar represents amino-acid substitutions per site. Full name and accessions for viruses given in Supplementary Table S8.



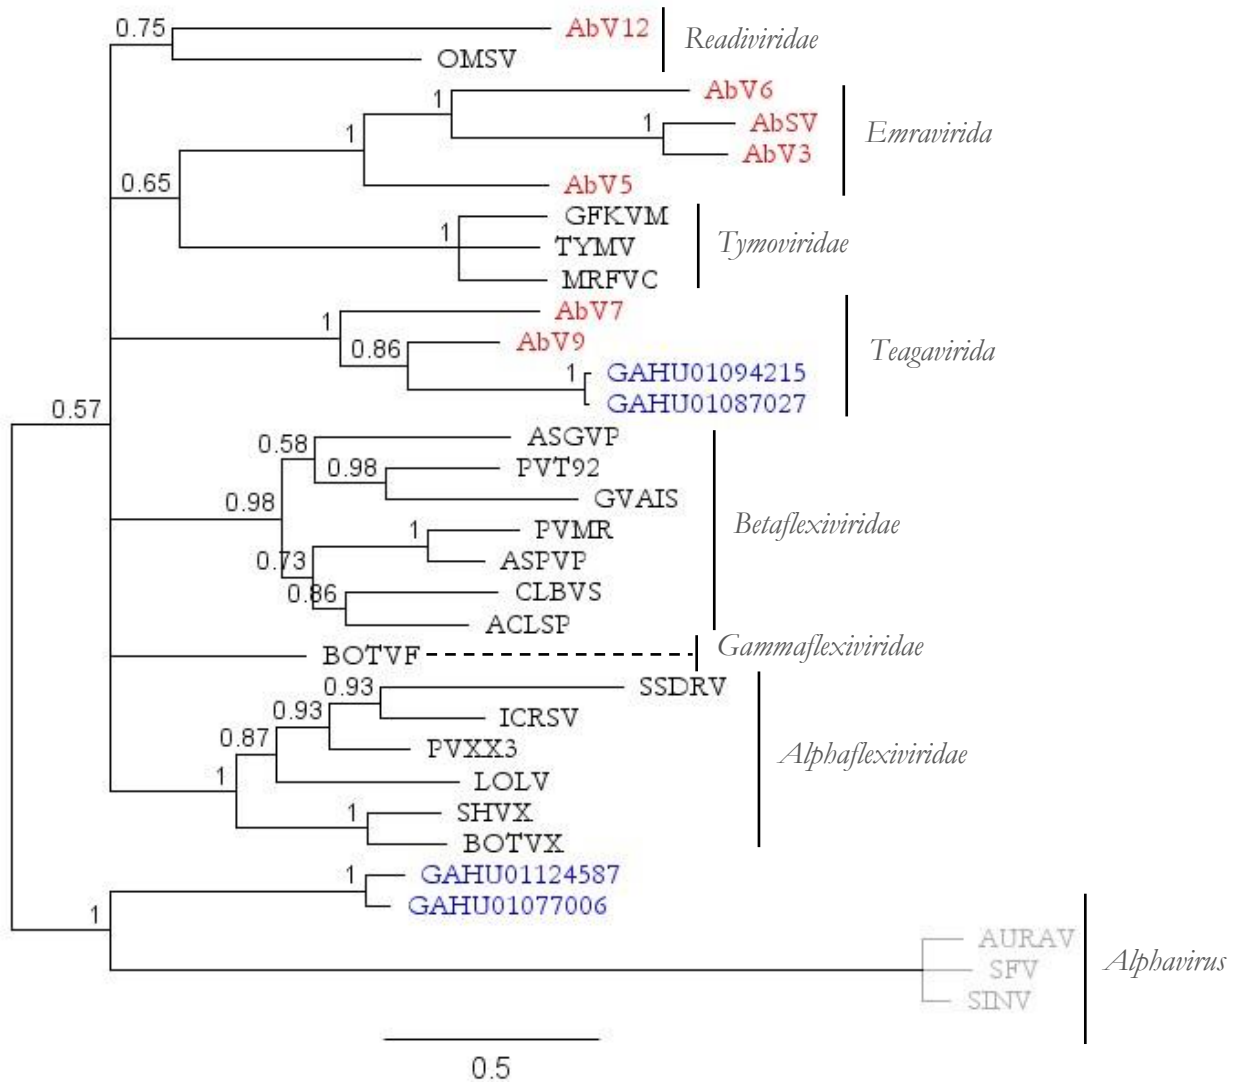

**Figure S3.** Proposed phylogenetic tree describing the relatedness of select viruses from the Tymovirales order. The RdRp domains were aligned using MUSCLE. The Bayesian inference tree was calculated using Mr Bayes with default parameters and a burn-in of 1,000,000 cycles. Values indicate the posterior probability of the clade. Selected members of the Alphavirus genus were used as an out-group.

Red nodes indicate viruses described here. Grey nodes indicate out-group. A search of the transcriptome database found two nearly complete viral replicase molecules in *Agave tequilana* (accessions GAHU01087027 and GAHU01094215) with high similarity to the C14 component (RdRp) of AbV9. Two further partial replicases similar to tymovirales replicases were also found (accessions: GAHU01077006 and GAHU01124587) (e-values are given in Supp. Table S9). These are highlighted in blue in the phylogenetic tree

The scale bar represents amino-acid substitutions per site.

Full name and accessions for viruses given in Supplementary Table S10.

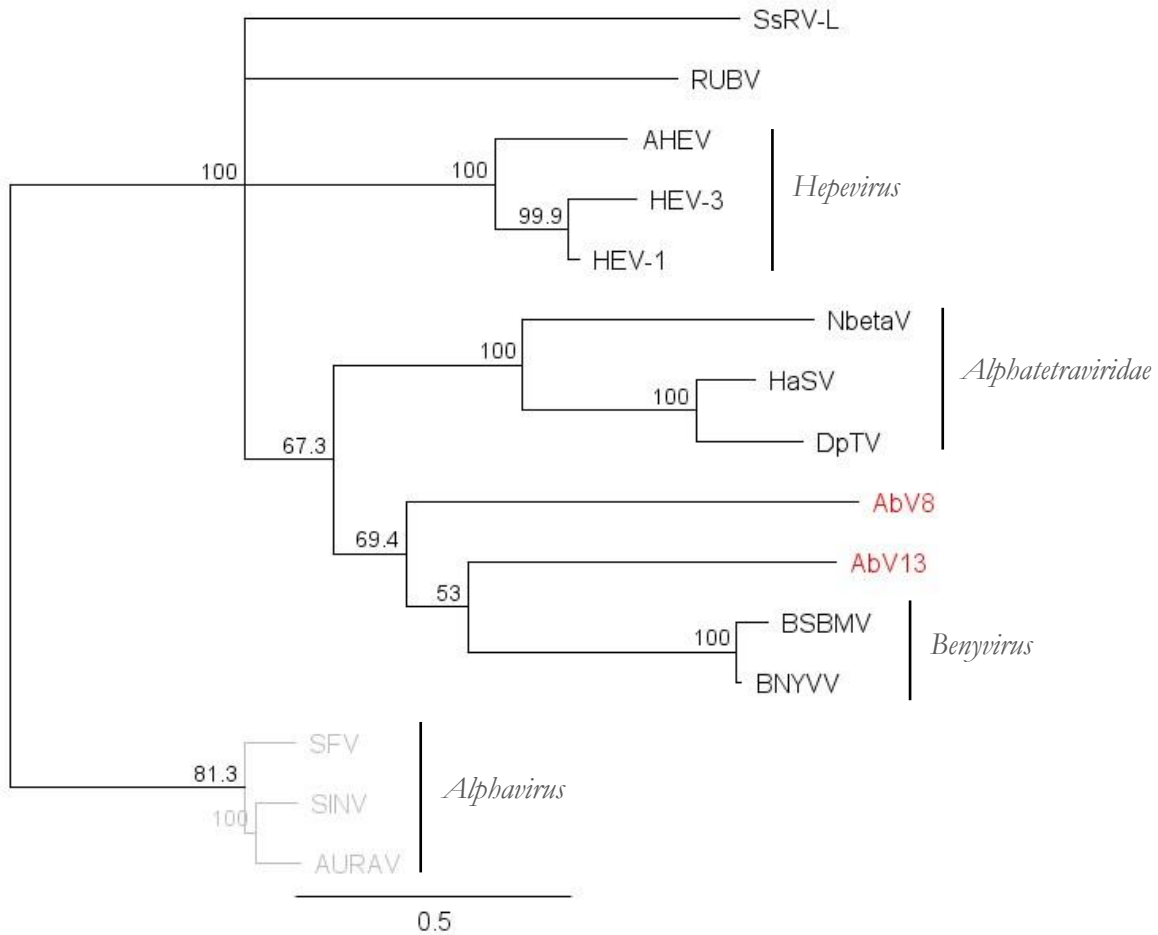

**Figure S4.** Proposed neighbour-joining phylogenetic tree depicting the relatedness of select members of the Rubi-like viruses. The RdRp domains were aligned using MUSCLE and the phylogenetic tree calculated using a neighbour-joining algorithm implemented in Geneious. Values indicate the consensus support for the clade based on 1000 bootstrap replicates. Branches corresponding to clades with less than 50% bootstrap support were collapsed. Select members of the Alphavirus genus were used as an out-group.

Red nodes indicate viruses described here. Grey nodes indicate out-group. The scale bar represents amino-acid substitutions per site.

Full name and accessions for viruses given in Supplementary Table S11.

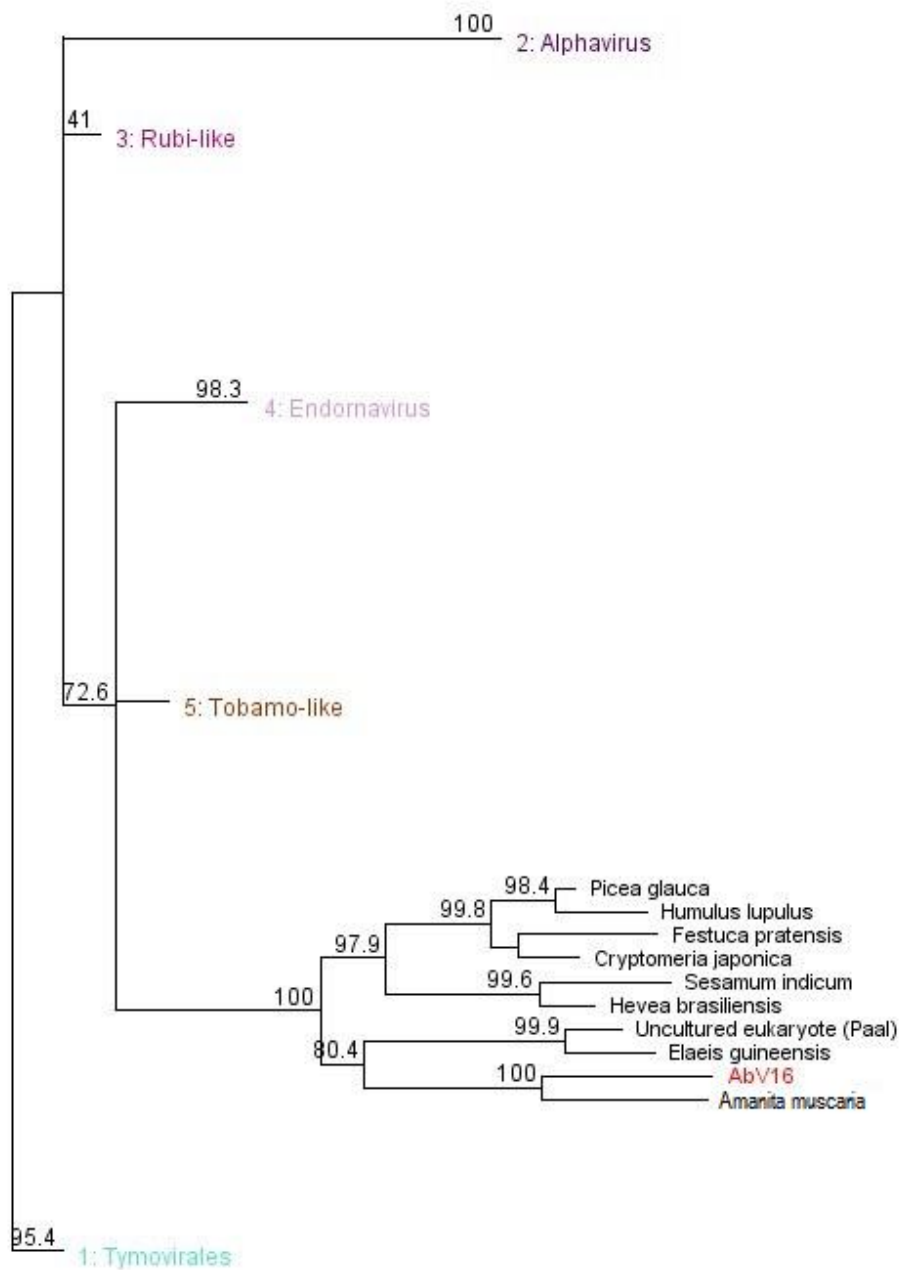

**Fi**

**Figure S5.** Proposed neighbour-joining phylogenetic tree of selected members of alphavirus-like supergroup. RdRp domains were aligned using MUSCLE and the phylogenetic tree calculated using the neighbour-joining algorithm implemented in Geneious. Branch values indicate the consensus support for the clade based on 1000 bootstrap replicates. Branches corresponding to clades with less than 40% bootstrap support were collapsed.

Numbered clades represent collapsed branches of major alphavirus-like groups. The expanded clade represents AbV16 (highlighted in red) and its homologs found in the Transcriptome Shotgun Assembly or Expressed Sequence Tag database (Table 4).

Full name and accessions for viruses used in construction of tree are given in Supplementary Table S12. Assembly or Expressed Sequence Tag database (Table 4).
